# Supplementary material for: Longitudinal Prediction of BMI using Explainable AI: Integrating Polygenic Scores, Maternal, Early-Life and Familial Factors
Source: Research Square preprint supplement (doi:10.21203/rs.3.rs-7126723/v1), 2025-07-29
Supplement: Supplementary file 2 [file 686c259d3f25a36f2e330d6d.docx]

Supplementary 1.xlsx file contains

- Sheet 1 – variables: the names, descriptions, values, and the metadata of all the variables used in this study.
- Sheet 2 – PGS: the details of the seven polygenic risk scores
- Sheet 3-9 – yr8/10/14/17/20/23/27: selected features, inclusive raw variables and the weights of the features generated by the models to estimate year 8, 10, 14, 17, 20, 23, 27 BMI. Each sheet also contains the standardised formulas and the raw formulas.

Supplementary 2.pdf file contains

1. Data Processing
   The dataset preprocessing workflow
2. Algorithm of variables clustering and selection
   It describes the method used for high-correlated variables clustering, and the data size of each age group before and after clustering
3. Model performance
   Depart from the model performance of R2 presented in the manuscript, it shows additional metrics, including
   3.1 Root Mean Squared Error,
   3.2 Mean Absolute Percentage Error,
   3.3 Confusion matrix for age 17, 20, 23 and 27 years
4. Pruned tree plots of the KAN models
   The pruned tree plots after training the KAN models for age 8, 10, 14, 17, 20, 23 and 27 years.
5. BMI estimation and the expression of the key variables
   It contains two sets of plots that show the models formularization on Y5BMIz and PGS7 across the seven age groups.
