# Supplementary material for: Longitudinal Prediction of BMI using Explainable AI: Integrating Polygenic Scores, Maternal, Early-Life and Familial Factors
Source: Research Square preprint supplement (doi:10.21203/rs.3.rs-7126723/v1), 2025-07-29
Supplement: Supplementary file [file 31ea4dec7b662e8f54f6c293.pdf]

## Supplementary 1. Data Processing

| D<br>a<br>t<br>a<br>s<br>e<br>t<br><br>1<br>&<br>2 | Age (year)                                                                        | 8                                                   | 10            | 14            | 17            | 20            | 23           | 27           |
|----------------------------------------------------|-----------------------------------------------------------------------------------|-----------------------------------------------------|---------------|---------------|---------------|---------------|--------------|--------------|
|                                                    | 1. Raw data                                                                       |                                                     |               |               | (2868, 201+7) |               |              |              |
|                                                    | 2. Exclude anomalies                                                              |                                                     |               |               | (2717, 201+7) |               |              |              |
|                                                    | 3. Remove variables with >50% missing values                                      |                                                     |               |               | (2717, 185+7) |               |              |              |
|                                                    | 4. Match outcome BMIs                                                             | (1312, 185+7)                                       | (1268, 185+7) | (1265, 185+7) | (1015, 185+7) | (1037, 185+7) | (743, 185+7) | (824, 185+7) |
|                                                    | 5. Drop data entries with missing values in birth, year 1 and 5-weight and height | (1044, 185+7)                                       | (999, 185+7)  | (984, 185+7)  | (808, 185+7)  | (805, 185+7)  | (582, 185+7) | (645, 185+7) |
|                                                    | 6. Convert weight and height into BMI z-scores, encode parental race              | (1044, 184+7)                                       | (999, 184+7)  | (984, 184+7)  | (808, 184+7)  | (805, 184+7)  | (582, 184+7) | (645, 184+7) |
|                                                    |                                                                                   | Apply algorithm of feature clustering and selection |               |               |               |               |              |              |
|                                                    | 7. Select important variables                                                     | (1044, 11+7)                                        | (999, 13+7)   | (984, 26+7)   | (808, 22+7)   | (805, 21+7)   | (582, 29+7)  | (645, 29+7)  |
|                                                    | 8. Remove data entries with missing values in the selected variables              | (824, 11+7)                                         | (635, 13+7)   | (443, 26+7)   | (426, 22+7)   | (559, 21+7)   | (257, 29+7)  | (375, 29+7)  |
|                                                    | 9. Form clusters                                                                  | (824, 10+5)                                         | (635, 10+5)   | (443, 20+5)   | (426, 20+5)   | (559, 10+4)   | (257, 10+3)  | (375, 10+3)  |

Supplementary Figure 1. Datasets preprocessing workflow. The form of (i, j+k) represents the number of samples (i), the number of dataset 1 variables (j), and the number of polygenic scores of dataset 2 (k).

## Supplementary 2. Algorithm of variables clustering and selection

To optimize data cleansing while preserving as many entries as possible, we developed a variable clustering and selection algorithm, applied after Step 6: “Convert weight and height into BMI z-scores, encode parental race” (as shown in Figure 1). This algorithm consists of three main stages: Step A (“Deep Clean”), Step B (“Cluster Variables”), and Step C (“Select Important Clusters”). Detailed descriptions of these steps are provided in Figure 1. The input data for this algorithm corresponds to the dataset obtained from Step 6 in Figure 1.

| Age (year)                                    |                                                           | 8                        | 10                        | 14                       | 17                        | 20                       | 23                        | 27                       |
|-----------------------------------------------|-----------------------------------------------------------|--------------------------|---------------------------|--------------------------|---------------------------|--------------------------|---------------------------|--------------------------|
| D<br>E<br>E<br>P<br><br>C<br>L<br>E<br>A<br>N | Input data                                                | (1044,<br>184+7)         | (999,<br>184+7)           | (984,<br>184+7)          | (808,<br>184+7)           | (805,<br>184+7)          | (582,<br>184+7)           | (645,<br>184+7)          |
|                                               | A1. Exclude variables with >20% missing values            | (1044,<br>181+7)         | (999,<br>181+7)           | (984,<br>180+7)          | (808,<br>181+7)           | (805,<br>181+7)          | (582,<br>181+7)           | (645,<br>181+7)          |
|                                               | A2. Impute the categorical variables with >80% similarity | (1044,<br>181+7)         | (999,<br>181+7)           | (984,<br>180+7)          | (808,<br>181+7)           | (805,<br>181+7)          | (582,<br>181+7)           | (645,<br>181+7)          |
|                                               | A3. Drop data entries with missing values                 | (176,<br>181+7)          | (167,<br>181+7)           | (166,<br>180+7)          | (147,<br>181+7)           | (148,<br>181+7)          | (113,<br>181+7)           | (120,<br>181+7)          |
|                                               | A4. Remove constant variables                             | (176,<br>140+7)          | (167,<br>140+7)           | (166,<br>138+7)          | (147,<br>140+7)           | (148,<br>139+7)          | (113,<br>139+7)           | (120,<br>140+7)          |
|                                               | B. Cluster variables                                      | (171, 121)               | (167, 120)                | (166, 101)               | (147, 120)                | (148, 71)                | (113, 71)                 | (120, 72)                |
|                                               | C. Select                                                 | n_cluster<br>11+7<br>0.9 | n_variable<br>14+7<br>0.9 | n_cluster<br>26+7<br>0.8 | n_variable<br>20+7<br>0.9 | n_cluster<br>21+7<br>0.6 | n_variable<br>29+7<br>0.6 | n_cluster<br>24+7<br>0.6 |

Supplementary Figure 2. Workflow of variables clustering and selection of Dataset 1 and 2. The form of (i, j+k) represents the number of samples (i), the number of Dataset 1 variables (j) and the number of Dataset 2 PGS (k)

In Step A (“*Deep Clean*”), we refined the dataset by removing variables with more than 20% missing values, imputing categorical variables with over 80% similarity, and dropping data entries with missing values in the remaining variables. Additionally, constant variables were eliminated. As shown in Figure A.I.1, this process significantly reduced the number of data entries. While such a reduction could adversely impact machine learning model development if used directly for training, we utilized this “clean” data solely for clustering and selection to identify important factors and eliminate redundant variables.

The implementation of Step B (“*Cluster Variables*”) is illustrated in Figure 2. First, we computed the correlation matrix of the input variables. For any pair of items with a correlation coefficient ( $r(A, B)$ ) exceeding the threshold value ( $r\_cutoff$ ), we replaced them with a single component ( $X$ ) derived through Principal Component Analysis (PCA). Each item could represent either a single variable or a cluster of multiple variables. The  $r\_cutoff$  value was tuned during model training and selected from options of 0.6, 0.7, 0.8, and 0.9.

After clustering, we obtained both the cluster patterns and the clustered dataset for Step C (“*Select  $n\_cluster$ ,  $n\_variable$ ,  $r\_cutoff$* ”) and subsequent analyses. These clusters were treated as independent units, exhibiting minimal dependency on one another.

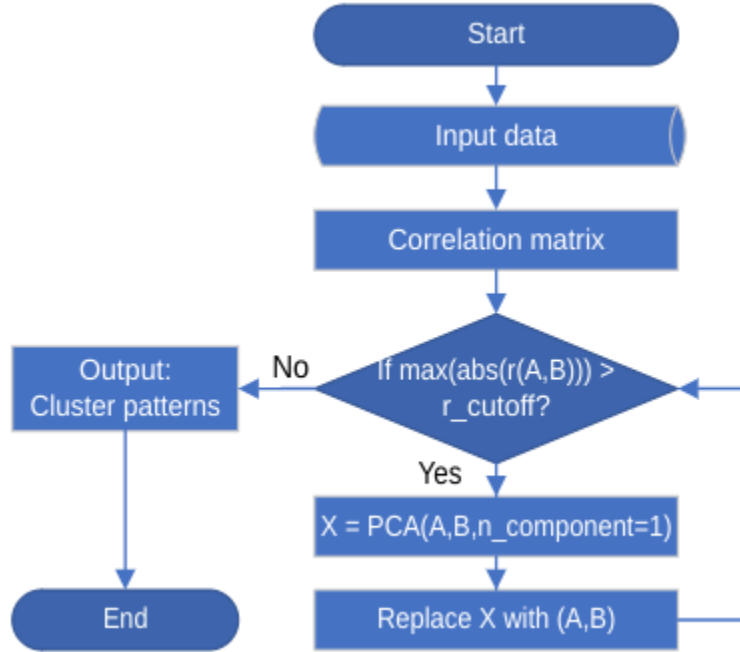

Supplementary Figure 3. Correlated-based clustering algorithm.

In Step C (“*Selection*”), we employed Recursive Feature Elimination (RFE) integrated with Extreme Random Forest (ERF) to identify potential predictors. The optimal number of predictors was determined by tuning among 10, 20, 30, and 40.

## Supplementary 3. Model performance

### 3.1 Root Mean Squared Error (RMSE)

RMSE were calculated in the following formula:

$$RMSE = \sqrt{\frac{1}{n} \sum_{i=1}^n (y_i - \bar{y}_i)^2},$$

where  $y_i$  represents the actual values, and  $\bar{y}_i$  represents the predicted values.

| Dataset | Model | Age (year) |      |      |      |      |      |      |
|---------|-------|------------|------|------|------|------|------|------|
|         |       | 8          | 10   | 14   | 17   | 20   | 23   | 27   |
| 1       | EN    | 1.2        | 2.14 | 2.84 | 2.78 | 3.7  | 3.8  | 4.64 |
|         | ERF   | 1.13       | 2.06 | 3    | 3.02 | 4.13 | 3.39 | 4.62 |
|         | GBM   | 1.14       | 2.1  | 2.76 | 3.12 | 3.72 | 3.55 | 4.83 |
|         | KAN   | 1.11       | 2.09 | 2.92 | 3.41 | 3.71 | 3.73 | 4.78 |
|         | Lasso | 1.15       | 2.15 | 2.85 | 3.06 | 3.76 | 3.56 | 4.8  |

|         |        |      |      |      |      |      |      |      |
|---------|--------|------|------|------|------|------|------|------|
|         | Ridge  | 1.17 | 2.17 | 2.85 | 3.07 | 3.67 | 3.59 | 4.62 |
|         | XGB    | 1.17 | 2.15 | 2.97 | 3.1  | 3.82 | 4.01 | 4.73 |
| 2       | EN     | 2.38 | 3.17 | 3.85 | 4.12 | 4.70 | 4.87 | 5.33 |
|         | ERF    | 2.38 | 3.17 | 3.87 | 4.12 | 4.72 | 4.89 | 5.32 |
|         | GBM    | 2.39 | 3.18 | 3.94 | 4.18 | 4.80 | 4.94 | 5.41 |
|         | KAN    | 2.39 | 3.17 | 3.86 | 4.12 | 4.70 | 4.90 | 5.31 |
|         | Lasso  | 2.38 | 3.17 | 3.85 | 4.12 | 4.70 | 4.87 | 5.33 |
|         | Ridge  | 2.38 | 3.17 | 3.85 | 4.11 | 4.69 | 4.87 | 5.32 |
|         | XGB    | 2.39 | 3.19 | 3.92 | 4.20 | 4.78 | 4.93 | 5.40 |
| 1 and 2 | EN     | 1.19 | 1.99 | 2.91 | 3.05 | 3.56 | 3.43 | 4.63 |
|         | ERF    | 1.09 | 2.09 | 2.65 | 2.99 | 3.59 | 3.99 | 3.76 |
|         | GBM    | 1.07 | 2.08 | 2.64 | 3.12 | 3.66 | 3.39 | 4.59 |
|         | KAN    | 1.1  | 2.01 | 2.7  | 3    | 3.96 | 3.7  | 4.46 |
|         | KAN-f* | 1.1  | 2.02 | 2.59 | 2.99 | 3.96 | 3.45 | 4.46 |
|         | Lasso  | 1.17 | 2.07 | 2.81 | 2.73 | 4    | 3.52 | 4.59 |
|         | Ridge  | 1.19 | 2.07 | 2.73 | 3.11 | 3.62 | 3.66 | 4.44 |
|         | XGB    | 1.13 | 2.11 | 2.93 | 3.08 | 3.7  | 3.42 | 4.69 |

\*formularized model result.

Supplementary Table 1. Model performance (RMSE) across the seven age groups and the seven models, by using Dataset 1, 2 and the combination datasets.

### 3.2 Mean Absolute Percentage Error (MAPE)

RMSE were calculated in the following formula:

$$MAPE = \frac{1}{n} \sum_{i=1}^n \left| \frac{y_i - \bar{y}_i}{y_i} \right| \times 100 ,$$

| Dataset | Model | Age (year) |       |       |       |       |       |       |
|---------|-------|------------|-------|-------|-------|-------|-------|-------|
|         |       | 8          | 10    | 14    | 17    | 20    | 23    | 27    |
| 1       | EN    | 4.96       | 8.36  | 9.48  | 8.89  | 11.18 | 11.17 | 12.79 |
|         | ERF   | 4.64       | 8.13  | 9.81  | 9.62  | 11.89 | 9.84  | 12.08 |
|         | GBM   | 4.71       | 8.24  | 9.2   | 9.84  | 11.01 | 10.68 | 12.84 |
|         | KAN   | 4.57       | 8.36  | 9.77  | 10.41 | 11    | 10.98 | 12.61 |
|         | Lasso | 4.8        | 8.48  | 9.53  | 9.67  | 11.38 | 10.66 | 12.66 |
|         | Ridge | 4.98       | 8.6   | 9.55  | 9.83  | 11.17 | 10.89 | 12.68 |
|         | XGB   | 4.75       | 8.3   | 9.89  | 9.81  | 11.42 | 11.48 | 12.92 |
| 2       | EN    | 9.76       | 12.57 | 12.96 | 12.53 | 13.44 | 13.93 | 14.27 |
|         | ERF   | 9.74       | 12.5  | 12.98 | 12.54 | 13.49 | 14.03 | 14.18 |

|         |        |      |       |       |       |       |       |       |
|---------|--------|------|-------|-------|-------|-------|-------|-------|
| 1 and 2 | GBM    | 9.75 | 12.52 | 13.24 | 12.78 | 13.75 | 14.15 | 14.41 |
|         | KAN    | 9.75 | 12.43 | 12.88 | 12.55 | 13.51 | 13.89 | 14.29 |
|         | Lasso  | 9.76 | 12.54 | 12.97 | 12.51 | 13.43 | 13.95 | 14.29 |
|         | Ridge  | 9.76 | 12.53 | 12.96 | 12.5  | 13.41 | 13.94 | 14.27 |
|         | XGB    | 9.72 | 12.5  | 13.14 | 12.71 | 13.69 | 14.12 | 14.35 |
|         | EN     | 4.92 | 7.92  | 9.6   | 9.58  | 10.7  | 10.31 | 12.3  |
|         | ERF    | 4.57 | 8.29  | 8.99  | 9.54  | 10.53 | 10.91 | 10.35 |
|         | GBM    | 4.53 | 8.09  | 9.07  | 9.66  | 10.72 | 10.05 | 12.03 |
|         | KAN    | 4.52 | 8.12  | 9.17  | 9.53  | 11.24 | 10.58 | 11.79 |
|         | KAN-f* | 4.59 | 8.16  | 8.98  | 9.51  | 11.24 | 10.36 | 11.79 |
|         | Lasso  | 4.93 | 8.3   | 9.5   | 8.6   | 11.29 | 10.27 | 12.01 |
|         | Ridge  | 4.95 | 8.25  | 9.18  | 9.76  | 10.7  | 10.67 | 11.91 |
|         | XGB    | 4.72 | 8.28  | 9.84  | 9.71  | 10.93 | 10.32 | 12.08 |

\*formularized model result.

Supplementary Table 2. Model performance (MAPE) across the seven age groups and the seven models, by using Dataset 1, 2 and the combination datasets.

### 3.3 Confusion matrix for age 17, 20, 23 and 27 years

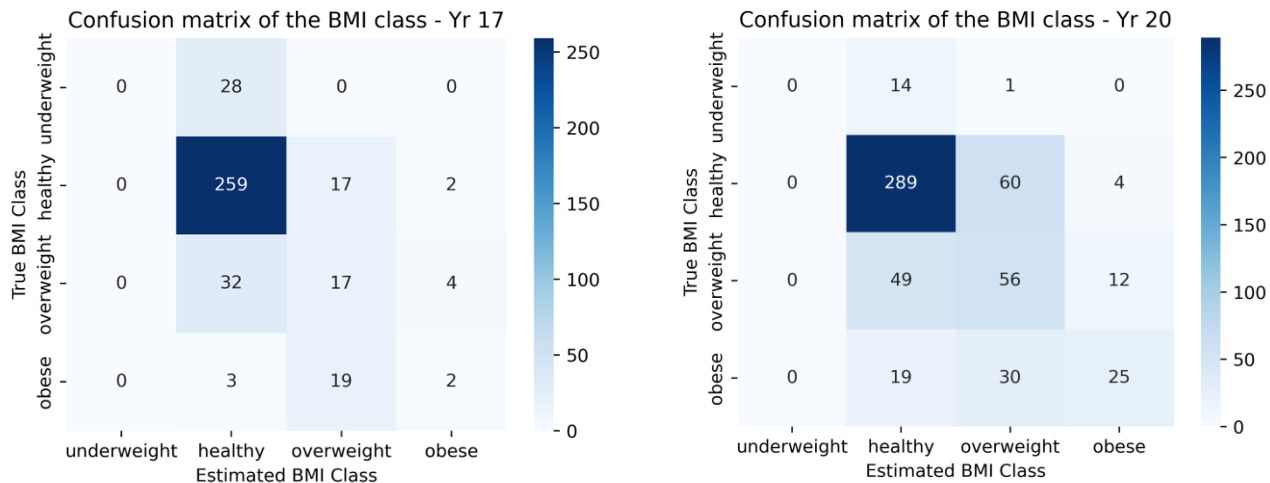

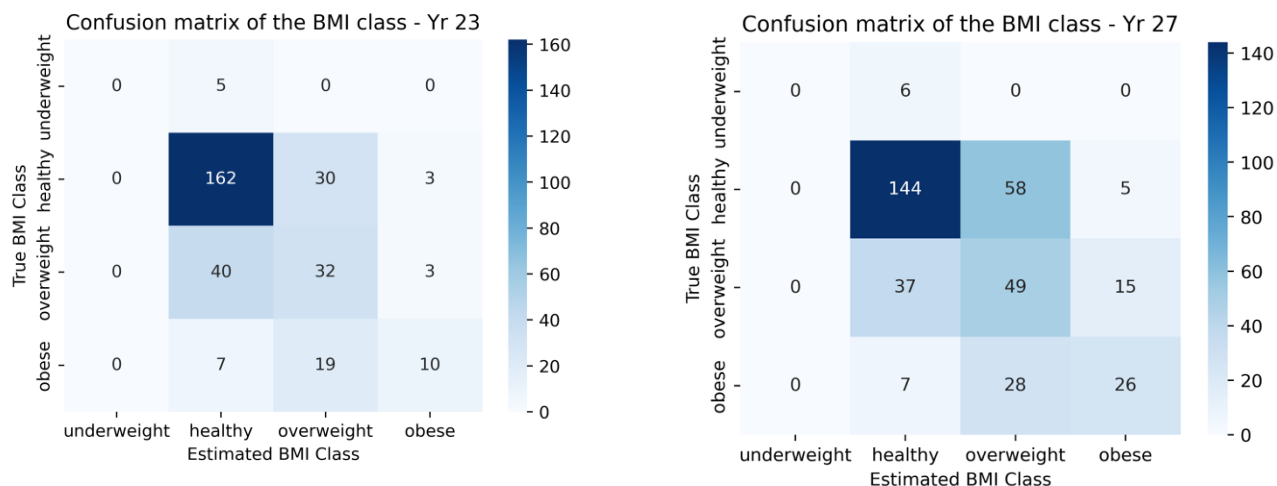

Supplementary Figure 4. Confusion matrix for age 17, 20, 23 and 27 years

## Supplementary 4. Pruned tree plots of the KAN models

The bottom black points represent the selected factors used in model development, the middle layer points represent the first-layer nodes of the KAN models, and the top point corresponds to the target BMI value for the specific age. The colour intensity of the connecting lines reflects the impact of the lower node on the upper node. Additionally, nail plots in the middle of the connecting lines represent the activation functions used in the models, with the most significant ones highlighted for further discussion in subsequent sections.

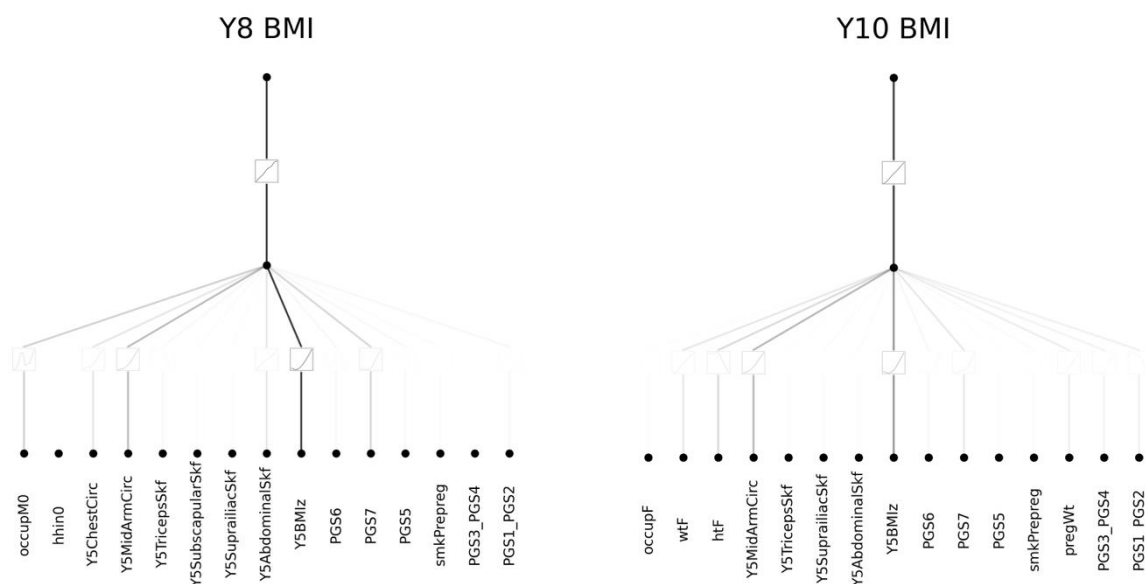

### Y14 BMI

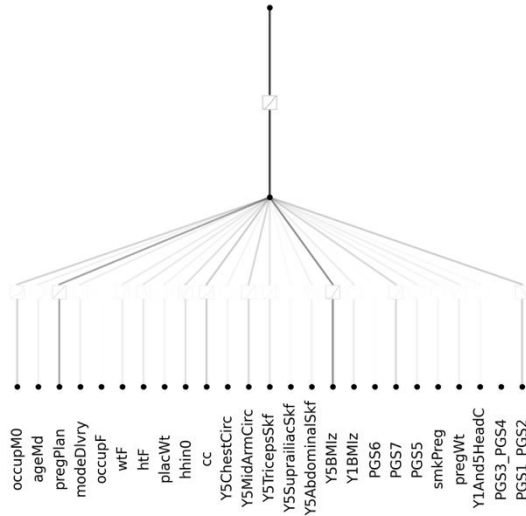

### Y17 BMI

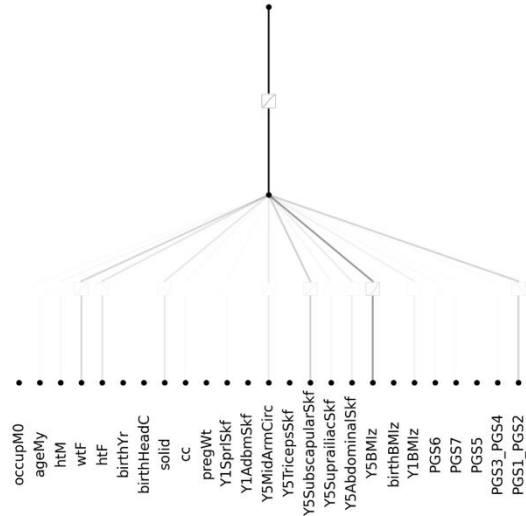

### Y20 BMI

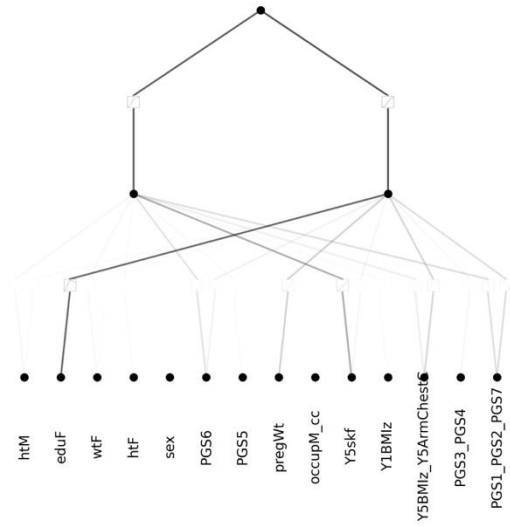

### Y23 BMI

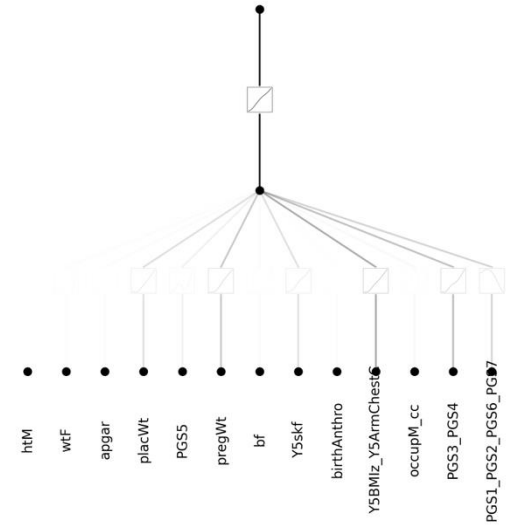

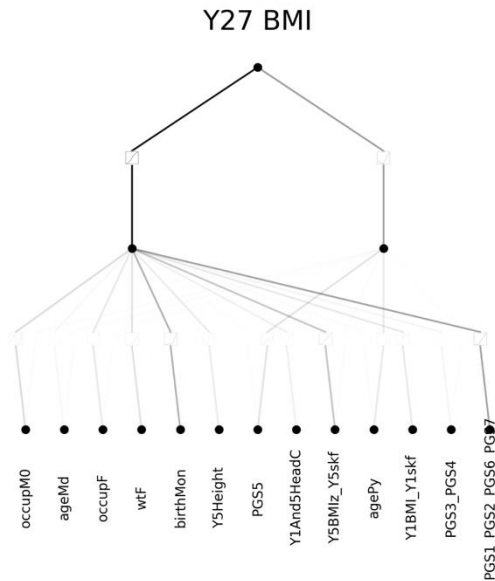

Supplementary Figure 5. Pruned tree plots of the KAN models

## Supplementary 5. BMI estimation and the expression of the key variables

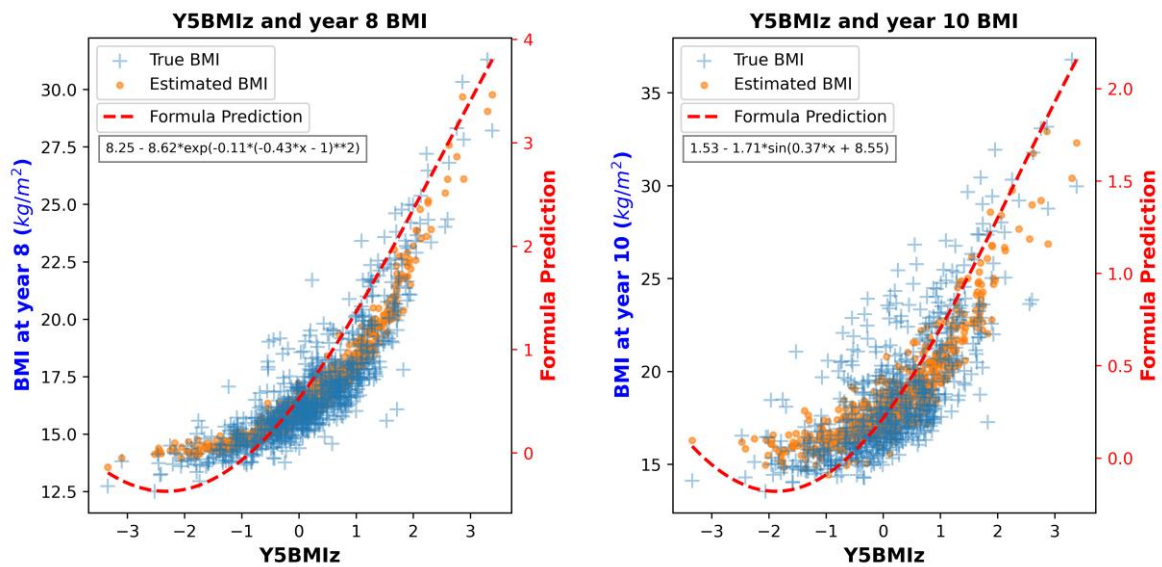



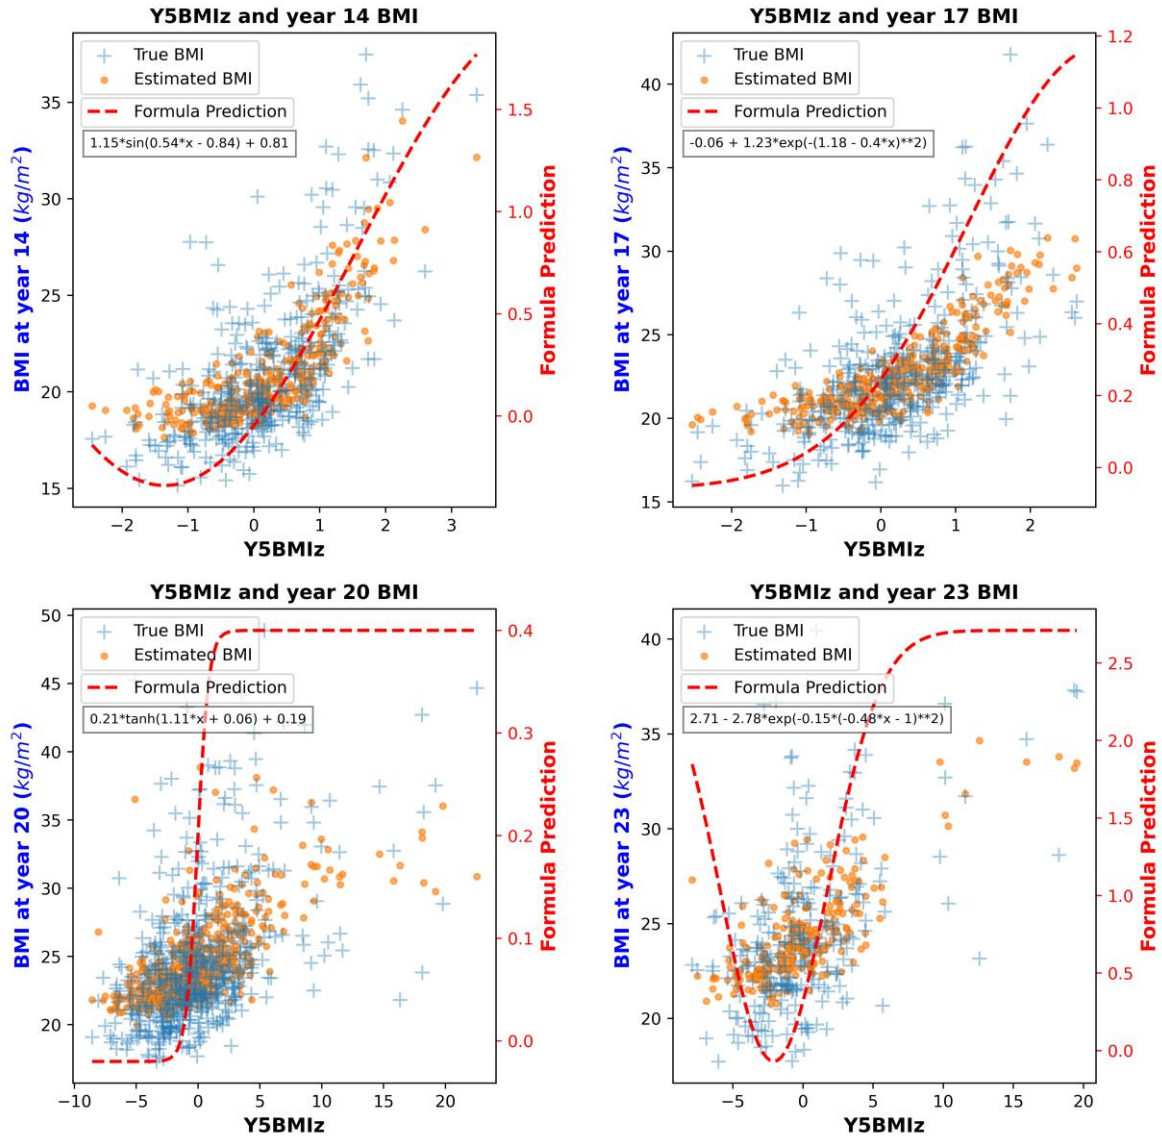

Supplementary Figure 6. BMI estimation and variable formularization on Y5BMiz across the age groups of 8, 10, 14, 17, 20, and 23 years. Orange dots – estimated BMI; blue crosses – real BMI; red dashed lines – formulas of the factor including Y5BMiz; “x” in the legend of function indicates Y5BMiz.

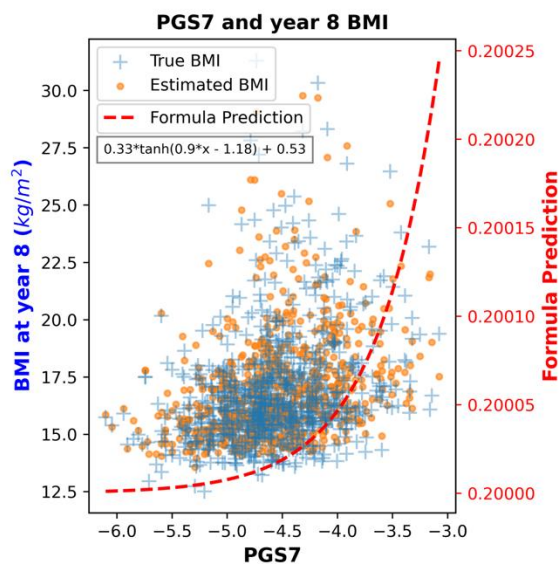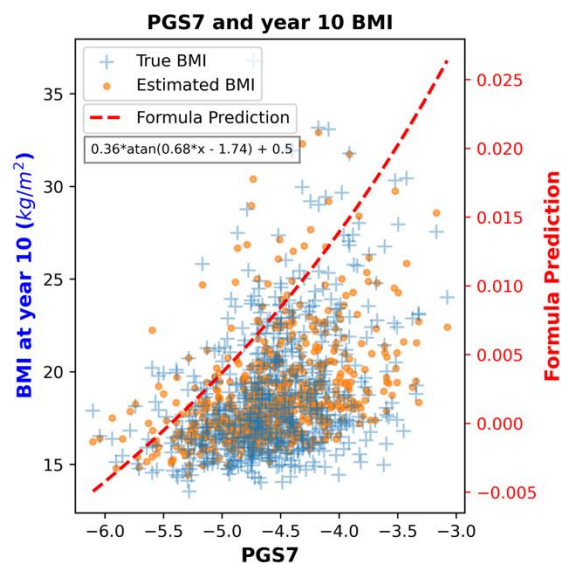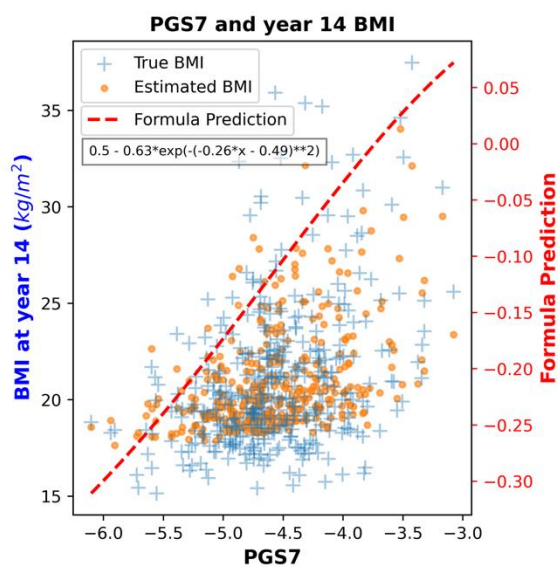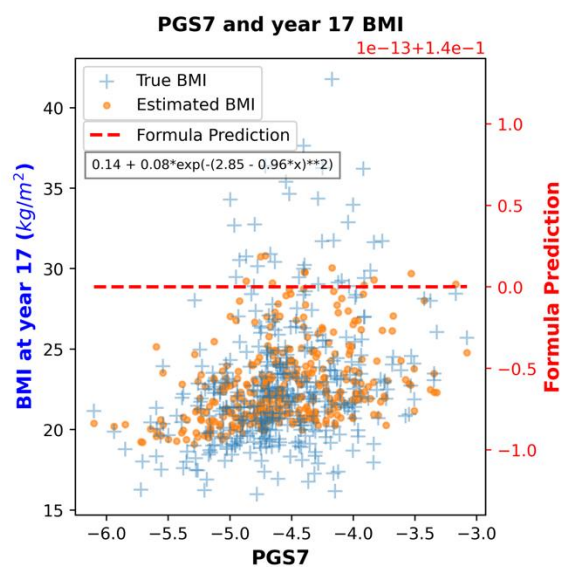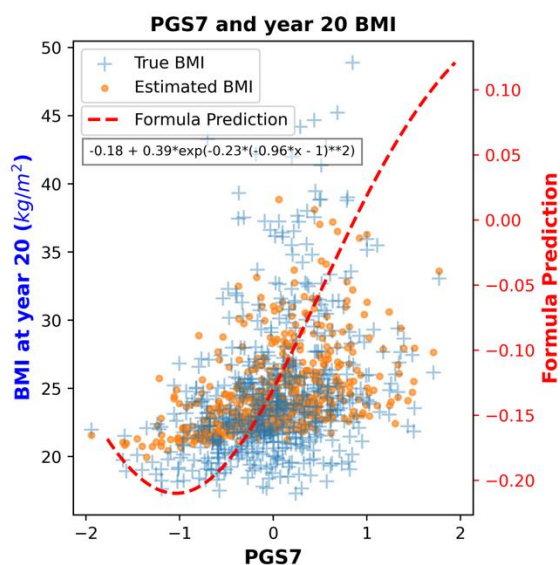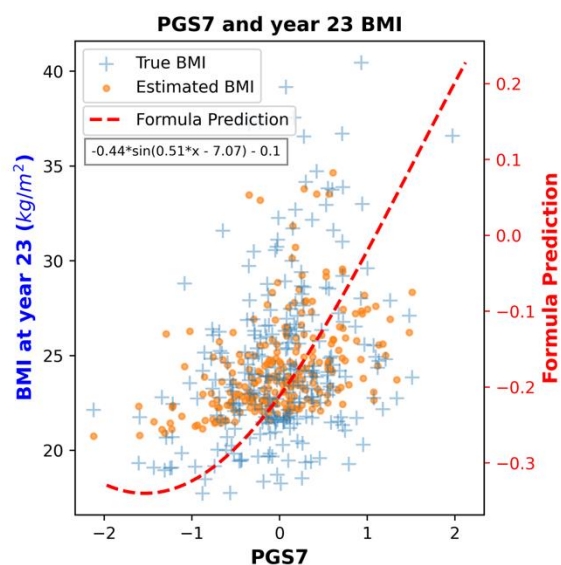

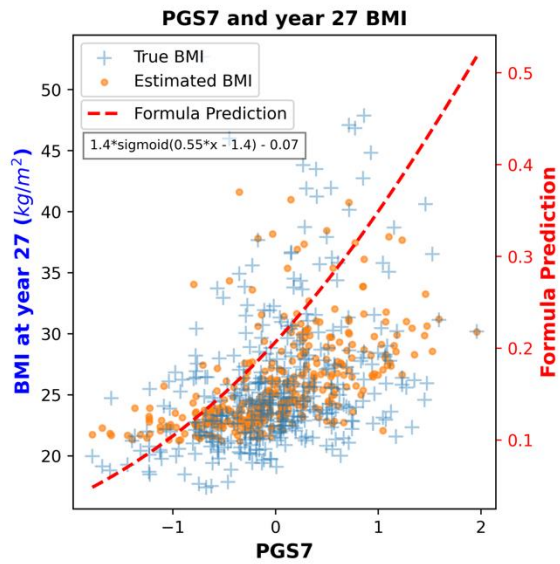

Supplementary Figure 7. BMI estimation and variable formularization on PGS7 across the age groups of 8, 10, 14, 17, 20, 23, and 27 years. Orange dots – estimated BMI; blue crosses – real BMI; red dashed lines – formulas of the factor including P0921; “x” in the legend of function – the factor containing PGS7.
